# Supplementary material
Source: publisher figshare collection journal article supplement (https://gsapubs.figshare.com/ndownloader/files/38829924)
Supplement: Supplementary file 1 [file 38829924]

## Sheet: Table DR1
Table S1: Whole-rock geochemistry for samples from the San Gabriel pluton (XRF data)
Unit		Los Espolones qtz-monzodiorite					Los Piques qtz-monzonite																Los Rodados monzogranite					Mafic Enclaves				Leucogranitic dykes
Sample		SG2001	SG2307	SG2310	SG1903		SG0101	SG0702	SG1301	SG1501	SG2311	SG2401	SG0702	SG1203	SG1601	SG2512	SG2607	SG1801	SG2108	SG2504	SG2304		SG0901	SG2202	SG2205	SG2601		SG2104	SG2308	SG2107		SG2204D	SG0901A	SG2402D
N (*)		6262374	6262352	6262303	6252698		6255021	6259800	6260878	6253607	6262112	6257529	6259800	6263308	6254635	6262596	6258806	6258305	6254386	6261905	6262253		6261582	6257224	6257254	6258674		6254446	6262371	6254386		6252703	6261587	6257534
E (*)		385897	385788	385756	388592		387622	388280	387417	388953	385829	389740	388280	384903	388159	386659	389208	386875	387493	386579	385864		386309	386518	386545	388247		387504	385701	387493		388592	386309	389740
H m.a.s.l. (**)		2031	1885	1819	1705		1549	1410	1304	1497	1727	1512	1410	1873	1425	2128	1802	1430	1600	1627	1825		1406	1480	1428	1475		1506	1885	1600		1705	1406	1512
Major elements wt.%
SiO2		55.5181	54.1391	52.0329	53.3898		59.1244	59.744	59.2942	56.3443	58.4645	57.2615	59.8595	55.0581	58.1443	62.7544	60.0149	58.8374	56.5876	64.2773	62.6399		67.8811	63.3893	64.8611	65.212		53.9886	51.6546	54.9259		67.2702	75.371	75.7136
TiO2		1.18651	1.04336	1.12187	0.967404		0.918332	0.856284	1.01414	1.03794	0.884423	0.922417	0.852861	0.871586	0.912305	0.640612	0.906788	0.947994	0.806095	0.6212	0.700537		0.428074	0.805136	0.903929	0.544512		1.19129	1.11949	0.824338		0.642503	0.175268	0.110548
Al2O3		17.3039	17.4511	17.1057	18.0771		17.0921	17.0113	16.5921	17.5735	17.4823	17.518	16.8393	18.0727	17.4331	16.0576	17.1684	17.3766	15.91	15.8416	16.3846		14.9568	16.3886	17.2602	15.8924		18.4373	18.9224	18.649		15.569	12.1303	11.8326
Fe2O3		7.82579	8.26914	9.9435	8.83563		5.41646	6.15411	6.78975	7.00911	6.36426	7.0241	6.17006	7.22298	6.22333	4.53349	4.85574	6.08728	4.92912	4.39021	4.95046		3.0442	4.17162	5.15309	3.74489		11.0243	9.17684	9.17657		3.38828	1.09841	0.947129
MnO		0.100535	0.153464	0.147326	0.102198		0.0945195	0.0835399	0.109368	0.117316	0.0966092	0.113436	0.0885702	0.12956	0.108206	0.0875798	0.0943537	0.100575	0.115685	0.0776501	0.100361		0.0417149	0.101263	0.118336	0.0597271		0.0641007	0.150932	0.0761993		0.0923536	0.0159334	0.0149389
MgO		3.62324	4.34285	5.26391	3.72972		2.60575	2.49526	2.595	3.19734	2.62638	2.86477	2.50285	3.95158	2.72401	1.8441	2.06982	2.45363	1.87965	1.93528	2.1503		1.41533	1.29954	1.59008	1.59471		3.02062	3.99519	2.99948		0.809335	0.317672	0.152377
CaO		6.19932	7.75793	8.41748	7.17665		5.6652	4.95968	4.76446	6.36387	5.44199	5.9176	4.9042	5.84591	5.29117	3.58093	5.15668	5.25977	3.38819	3.67842	4.08497		2.77503	3.14013	3.4765	3.41938		5.32628	8.52814	5.61302		2.02284	0.811608	0.547761
Na2O		4.20952	4.04489	3.72894	4.36275		4.64439	4.58873	4.59146	4.47489	4.4749	4.55835	4.53002	4.50516	4.55061	4.57974	4.75244	4.63143	4.2239	4.39519	4.53212		3.97881	4.57369	4.64395	4.42478		3.48511	4.13713	3.92971		4.28799	2.69972	2.40517
K2O		2.50939	1.52069	0.976531	1.65699		2.89528	2.72002	2.54926	2.34233	2.65128	2.29758	2.75563	1.49681	3.08337	3.34378	3.19213	2.96746	3.7556	3.22646	3.06845		3.8338	4.54986	4.07912	3.52987		1.4181	0.989552	1.77732		4.61669	5.73005	6.38989
P2O5		0.325494	0.226211	0.339447	0.278811		0.241771	0.243658	0.275408	0.312179	0.259949	0.270655	0.240831	0.225749	0.253142	0.160399	0.246313	0.265876	0.224892	0.153309	0.187803		0.0963416	0.219402	0.245622	0.133391		0.19033	0.334848	0.29886		0.147964	0.0239001	0.0169308
Cr2O3		0.00798699	0.0129772	0.0166004	0		0.00372266	0.00636655	0.00651014	0.0060884	0.00398853	0.00367946	0.00101815	0.00602507	0.0038304	0.00772332	0.00236613	0.00414791	0.00407146	0.00254625	0.00425525		0.00486298	0.00459964	0.00571188	0.00424833		0.0055059	5.84358e-05	0		0	0	0
NiO		0.00461062	0.00694914	0.00871503	0.00128785		0.00324116	0.00403709	0.00399804	0.00364359	0.00305441	0.00327952	0.00167161	0.00429654	0.00299389	0.00405716	0.0019337	0.0031679	0.00272046	0.00205223	0.00298412		0.00279317	0.00319619	0.00277126	0.00252079		0.00288629	0.00281099	0.00182596		0.000947753	0.00158402	0.00110258
LOI		0.457218	0.345354	0.4535	0.773984		0.501783	0.544512	0.569931	0.57635	0.399459	0.490684	0.479212	1.83407	0.724493	1.58257	0.674491	0.4181	7.39381	0.444359	0.629527		0.672888	0.718447	0.574099	0.450333		1.37705	0.0448517	1.03262		0.691861	0.41112	0.401052
Total		99.2717	99.314	99.5564	99.3523		99.207	99.4115	99.1556	99.3588	99.1531	99.246	99.2257	99.2245	99.4549	99.177	99.1363	99.3533	99.2213	99.0456	99.4363		99.1317	99.3649	102.915	99.0128		99.5315	99.0569	99.3048		99.54	98.7866	98.5331
Trace elements ppm
Rb		85.5	38.6	27.5	37.1		80.2	102.3	78.1	62	85.3	77	104.3	37.3	96.8	116.2	75.3	96.8	137.9	105.5	104.2		114.3	163.8	168	114.2		57.5	24.3	84.8		173.6	143	147.1
Ba		608.4	475.3	311.4	424.2		515.9	529.6	867.8	475.4	555	441.1	525.7	358.2	521.3	626.7	539.5	453.4	634.7	582.8	536.4		631.7	593.1	566.5	606.4		291.5	324.1	323.2		685.2	806	179.5
Sr		585.6	679.6	745.7	633		454.4	531.9	443.9	550.1	582.5	536.8	526.2	705.6	468.4	428.7	445.1	455	405.3	464.8	496.2		402.3	302.6	318.5	441		455.5	808	633.9		258.4	207.6	132.4
Nb		8.9	6.4	5.3	6.7		3.5	8	7.8	6.9	6	3.1	7.8	3.9	8.2	5.3	9.2	3.3	4.7	6.6	5.7		6.6	12	9.8	6.4		5.6	5.4	5.2		5.8	0.8	0
Zr		276.1	115.2	81	95.1		183.2	218.2	242.1	179.8	233.9	199.5	237	105	185.7	200	270.3	255.7	302.1	199.4	208		127.7	380	369.5	185.4		137.8	54.1	112.5		396.5	54.4	100.2
Hf		9.7	7.1	7	6.9		5.1	6.8	0	7.5	8.7	8.2	9.8	3.4	9.4	7.8	12.4	9.3	8.6	7.5	6.9		10.1	13.9	9.1	8.8		5.7	6.9	5.4		14.2	2.4	4.4
Y		21.3	18.4	17.1	19.5		22.8	21.2	17.8	23.5	21.1	21.3	20.4	14	24.7	15.3	25.5	23.5	25	15.3	17.9		8	30.5	30	13.9		25.5	16.6	13.8		18.3	1.5	4.7
Ga		23.3	22	23.6	22.7		22.3	21.4	21.1	22.1	20.4	22.5	21	21.9	22.4	19.7	21.5	20.8	21.1	20	20.7		17.5	20.5	19.7	19.7		23.1	22.7	23.5		20.4	14.3	12.1
Zn		79.2	85.9	108.5	30.6		53.4	45.9	67.8	51.3	63.5	59.6	48.3	60	59.9	71	57.3	57.9	69	45.5	57.8		29.1	71.9	102.2	40.8		45.9	97.1	71		74.1	16.5	15.4
Cu		87.5	97.6	112.2	49.2		84.8	66.6	671.1	145	77.2	82.9	65.6	51.4	30.6	43.2	12.6	105.6	54.7	69.5	99.4		13.6	26.6	52.1	47.7		7	98.7	26.8		11.7	7.5	12.6
Ni		36.4	54.8	68.8	10.2		25.6	31.9	31.6	28.8	24.1	25.9	13.2	34.4	23.7	32.4	15.3	25	23.1	16.2	23.6		22.1	25.3	21.9	19.9		23	22.1	14.5		7.5	12.5	8.7
Co		24.8	26.5	34.4	21.6		13.3	37.1	33.2	18.8	17.7	16.3	14.8	26.4	15	11.7	11.1	28.9	13.5	12	11.3		29.9	6	31.9	9.9		29.5	28.2	24.8		10.1	4.5	5.2
Cr		54.9	89.1	114.1	0		25.6	43.8	44.8	41.9	27.4	25.3	7	42	26.4	53.7	16.3	28.5	30.1	17.5	29.3		33.5	31.7	39.3	29.2		38.2	0.4	0		0	0	0
V		186.6	204	287	188.1		126.5	133.8	149.3	186.6	131.9	159.1	130.2	183.7	138.9	93	108.1	138.4	96.3	90.5	105		64.9	67.4	84	78.4		111.7	217.9	178.2		38.4	19.4	9.1
Sc		17.3	23.1	24.8	17.2		14.7	13.7	14.6	20	11.7	16.2	13	16.3	17.1	8.7	13.7	15.3	12.9	10	12.6		5.7	12.3	12.3	9.3		23.4	19.3	18		9.3	0.4	2
La		24.2	12.7	15.5	6.9		22.6	21.1	16.4	17.9	20.6	28.1	23	13.7	10	21.8	30.5	22.6	10.9	16.8	22.6		18.3	23.4	40.9	22.2		26.5	3.6	13		57.3	0.2	10.8
Ce		37.2	40.1	29	36.4		67.4	52.4	44.8	71.8	55.8	46	52.1	38	41.9	35.2	85.9	63.8	50.1	35.4	58.7		32.4	83.6	75.8	37.8		54.7	43.2	25.6		115.2	2.7	33.5
Nd		18.8	26.7	24	26.9		25.3	29.5	25.9	31.5	27.4	22.9	31.2	12.9	27.8	16	29.7	26.4	29	21.5	27.7		8.3	37.6	32	14		40.3	24.3	21.7		43.3	10.4	10
Pb		69.2	67.8	71.3	64.1		66	71.5	70.4	68.4	62.7	62	71.4	74.9	74.6	73.8	86.7	66.3	79.7	74.8	64.7		69.7	84.9	75.9	76.3		63.2	80.5	66.3		73.9	64.4	60.4
Th		42.1	38.6	43	38.7		41.7	48.3	42.3	45.2	45.6	38.4	46.5	38.9	48.5	47.1	48.7	40.1	44.9	49.2	43.9		48.3	60.2	41.6	46.5		38.2	41.2	36.1		55.4	52.7	92.8
U		0	0	0	0		0.5	0	0	0	0	0	0	0	0	0	0.3	0	0	0	0		0	1.1	0	0		0	0	0		0.3	0	10.6
W		3.7	8.7	6	5.3		2.7	169.9	136.6	5.6	3	2.4	4	59.5	5.5	7.1	1.5	107.9	3.7	3.8	4.9		161.3	4.4	173.7	1.4		106.2	3.2	0		5.3	2.6	3.1
(*) Location in UTM coordinates (UTM 19S / Datum: WGS84)
(**) Altitude in meters above sea level
Payacán, I., Gutiérrez, F., Bachmann, O., and Parada, M.Á., 2023, Differentiation of an upper crustal magma reservoir via crystal-melt separation recorded in the San Gabriel pluton (central Chile): Geosphere, v. 19, https://doi.org/10.1130/GES02535.1
